# Supplementary material for: Russeting in Apple is Initiated after Exposure to Moisture Ends: Molecular and Biochemical Evidence
Source: MDPI journal article supplement (doi:10.3390/plants10010065), 2020-12-30
Supplement: s1 [file s1]

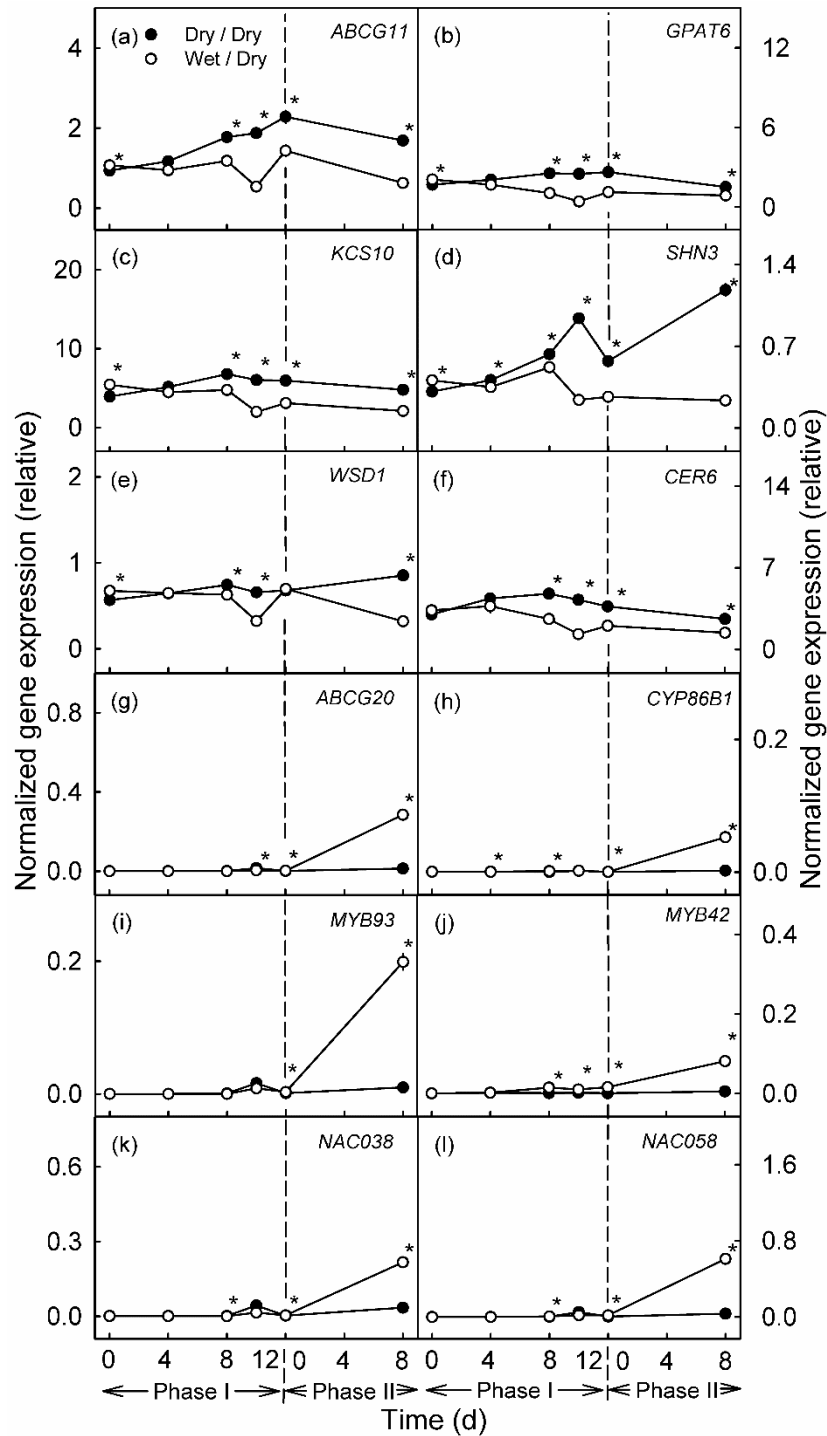

**Figure S1.** Time course of expressions of genes related to cutin, wax (a-f) and suberin and lignin synthesis (g-l) of apple fruit skin during exposure to moisture (Phase I) and after exposure to moisture ceased (Phase II). During Phase I, a patch of the fruit skin was exposed to moisture for 12 d beginning at 23 days after full bloom (DAFB) (wet). During the subsequent Phase II, moisture exposure was discontinued and the patch was exposed to the atmosphere (Dry). Moisture exposed patches of fruit skin are referred to as wet/dry, unexposed (control) patches as dry/dry. The end of the period of moisture exposure is indicated by the vertical dashed line. The expression values are means  $\pm$  SE of three independent biological replicates comprising six fruit each. The '\*' indicates significant difference between dry/dry and wet/dry at  $p \leq 0.05$  (Student's t-test).

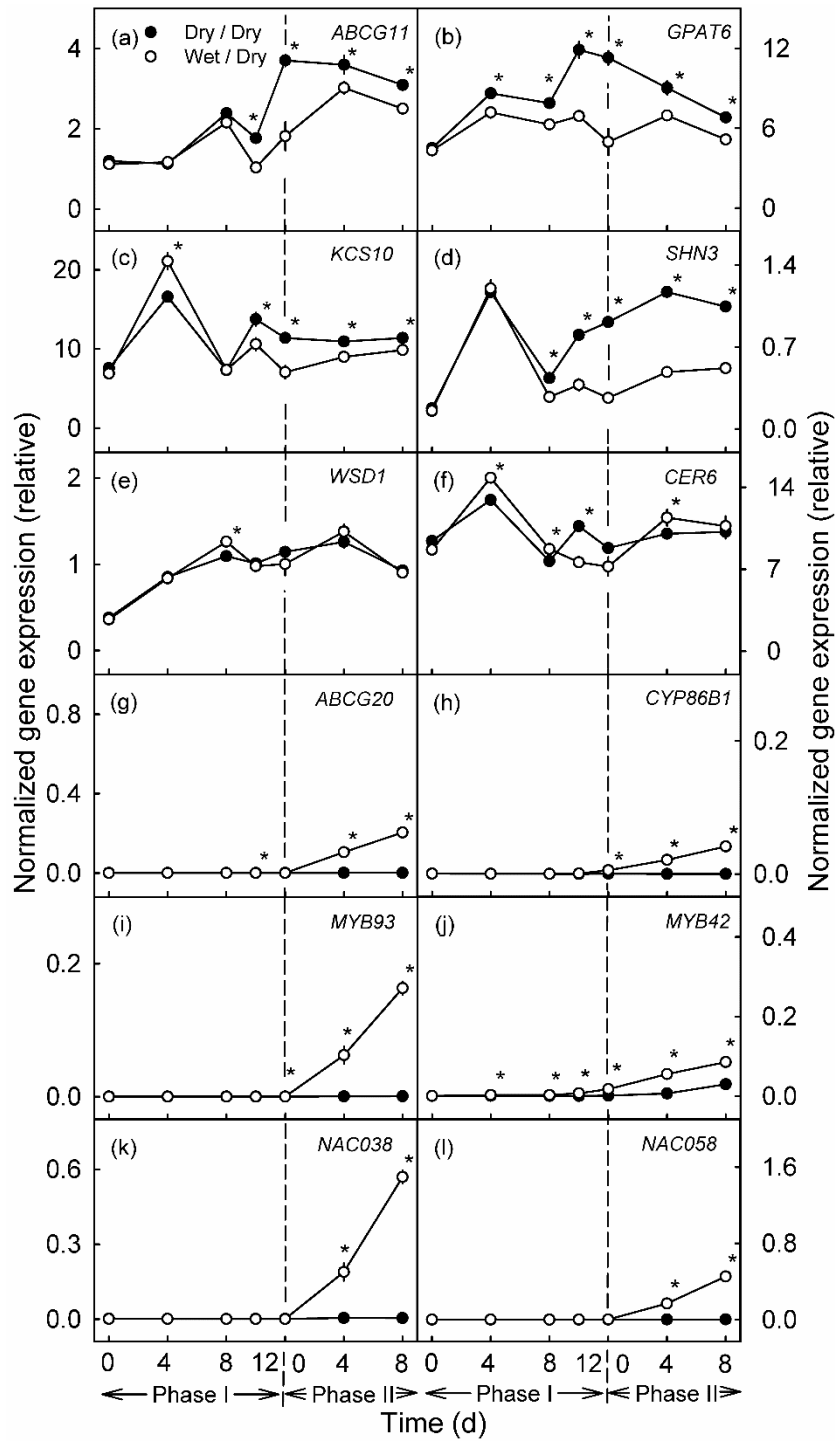

**Figure S2.** Time course of expressions of genes related to cutin, wax (a-f) and suberin and lignin synthesis (g-l) of apple fruit skin during exposure to moisture (Phase I) and after exposure to moisture was discontinued (Phase II). During Phase I, a patch of the fruit skin was exposed to moisture for 12 d beginning at 21 days after full bloom (DAFB) (wet). During the subsequent Phase II, moisture exposure was discontinued and the patch exposed to the atmosphere (Dry). Moisture exposed patches of fruit skin are referred to as wet/dry, unexposed (control) patches as dry/dry. The end of the period of moisture exposure is indicated by the vertical dashed line. The expression values are means  $\pm$  SE of three independent biological replicates comprising six fruit each. The '\*' indicates significant difference between dry/dry and wet/dry at  $p \leq 0.05$  (Student's t-test)

**Table S1.** Primers for genes analyzed used in the present study.

| Gene name        | Accession     | Primer sequence (5'-3') |                        | PCR efficiency (%) | Reference  |
|------------------|---------------|-------------------------|------------------------|--------------------|------------|
|                  |               | Forward Primer          | Reverse Primer         |                    |            |
| <i>ABCG11</i>    | MDP0000200335 | TGGCGGGTTTCCTTCTTTCA    | CACAAATGCAGTAACGCCGT   | 98.7               | This study |
| <i>ABCG20</i>    | MDP0000265619 | ACTGGGCATGGACAACAACA    | ATTTTCCCGACCCACTTGCT   | 102.9              | This study |
| <i>CER6</i>      | MDP0000392495 | AGCAACAACCCTAAGAGCGT    | GTTGGGCGGAATGTAGTGGA   | 85.0               | This study |
| <i>CYP86B1</i>   | MDP0000306273 | CGCTTTGTGACCCCATCC      | AATGACGTCTTCCGCAAACCT  | 109.3              | [9]        |
| <i>eF-1alpha</i> | AJ223969.1    | ACTGTTTCCTGTTGGACGTGTTG | TGGAGTTGGAAGCAACGTACCC | 93.0               | [9]        |
| <i>GPAT6</i>     | MDP0000479163 | TCTTGAACCAGCTACCGTCG    | AATCCCAAAGTCCCAGCCAA   | 91.0               | This study |
| <i>KCS10</i>     | MDP0000235280 | TGCTGAGGTGGGAAGTTTGA    | ACACCAAAGAACCCTAGCACA  | 91.6               | This study |
| <i>MYB42</i>     | MDP0000787808 | CCTTGGCAATAGGTGGTCGA    | TGATGTGCGTGTTCCAGTGA   | 94.2               | This study |
| <i>MYB93</i>     | MDP0000320772 | TGGACAAACTATCTTAGGCCGG  | GTTGCCGAGGATGGAATGGA   | 102.5              | This study |
| <i>NAC038</i>    | MDP0000232008 | CGGCGGATCATCAAGTAGCA    | AAACCCTCCTCCTCCTCCAA   | 84.6               | This study |
| <i>NAC058</i>    | MDP0000130785 | AGCCACAACAAGCAACAACA    | TTTGGCAGCTCGATGTCTCC   | 90.7               | This study |
| <i>PDI</i>       | MDP0000233444 | TGCTGTACACAGCCAACGAT    | CATCTTTAGCGGCGTTATCC   | 100.6              | [62]       |
| <i>SHN3</i>      | MDP0000178263 | GGGACGTTTGAGACAGCAGA    | TTTTGGTCGGTGGCAGGTTT   | 93.6               | This study |
| <i>WSD1</i>      | MDP0000701887 | AGAAATGGTCAAACCCGACA    | AGACGAAGTCAAGCGCATTT   | 91.1               | [9]        |

**Table S2.** Effect of moisture exposure on the composition of the cuticle/periderm polymer. During exposure to moisture and following discontinuation of exposure a mixed polymer comprising cutin and suberin formed. Using the bark periderm of the trunk (BP) of ‘Pinova’ apple trees, the composition of pure suberin was determined. Assuming the suberin composition of periderms of terrestrial surfaces within the same species and cultivar to be identical, the content of  $\omega$ -hydroxy-C<sub>20</sub>, -C<sub>22</sub>, and -C<sub>24</sub> acids in bark suberin was used to calculate a normalized suberin composition and mass per unit area for the mixed cuticle/periderm surface of the fruit. The experiment was run as a two-phase experiment. During Phase I, the fruit were exposed to moisture for 12 d beginning at 31 days after full bloom (DAFB) (‘wet’). Moisture exposure was discontinued at the onset of Phase II (‘dry’). The treated patches of fruit skin were sampled 113 d after moisture exposure ceased. Patches of fruit skin that remained dry during both phases served as control (dry/dry). For details of the analysis see Materials and Methods. The study was carried out using three replicates. ND = not detected.

|                     | Fruit Cutin and Suberin<br>( $\mu\text{g cm}^{-2}$ ) |                | Bark Suberin<br>( $\mu\text{g cm}^{-2}$ ) | Bark Suberin<br>(%) | Fruit Cutin<br>( $\mu\text{g cm}^{-2}$ ) |                | Fruit Suberin<br>( $\mu\text{g cm}^{-2}$ ) |               |
|---------------------|------------------------------------------------------|----------------|-------------------------------------------|---------------------|------------------------------------------|----------------|--------------------------------------------|---------------|
|                     | Dry/Dry                                              | Wet/dry        |                                           |                     | Dry/Dry                                  | Wet/Dry        | Dry/Dry                                    | Wet/Dry       |
| Aromatics           |                                                      |                |                                           |                     |                                          |                |                                            |               |
| Hydrocinnamic acid  | 11.8 $\pm$ 3.3                                       | 7.4 $\pm$ 1.7  | ND                                        | ND                  | 11.8 $\pm$ 3.3                           | 7.4 $\pm$ 1.7  | 0.0 $\pm$ 0.0                              | 0.0 $\pm$ 0.0 |
| Cinnamic acid       | ND                                                   | ND             | 5.0 $\pm$ 1.0                             | 0.5                 | ND                                       | ND             | ND                                         | ND            |
| cis-Coumaric acid   | 1.1 $\pm$ 0.3                                        | 0.7 $\pm$ 0.1  | ND                                        | ND                  | 1.1 $\pm$ 0.3                            | 0.7 $\pm$ 0.1  | 0.0 $\pm$ 0.0                              | 0.0 $\pm$ 0.0 |
| trans-Coumaric acid | 6.3 $\pm$ 1.4                                        | 1.7 $\pm$ 0.6  | ND                                        | ND                  | 6.3 $\pm$ 1.4                            | 1.7 $\pm$ 0.6  | 0.0 $\pm$ 0.0                              | 0.0 $\pm$ 0.0 |
| Benzoic acid 1      | ND                                                   | ND             | 2.9 $\pm$ 0.6                             | 0.3                 | ND                                       | ND             | ND                                         | ND            |
| Benzoic acid 1      | ND                                                   | ND             | 4.8 $\pm$ 1.4                             | 0.5                 | ND                                       | ND             | ND                                         | ND            |
| trans-Ferulic acid  | ND                                                   | ND             | 39.3 $\pm$ 4.4                            | 4.0                 | ND                                       | ND             | ND                                         | ND            |
| Linoleic acid       | ND                                                   | ND             | 10.4 $\pm$ 1.5                            | 1.1                 | ND                                       | ND             | ND                                         | ND            |
| Carboxylic acids    |                                                      |                |                                           |                     |                                          |                |                                            |               |
| C16                 | 8.0 $\pm$ 1.2                                        | 6.3 $\pm$ 0.8  | 4.6 $\pm$ 0.9                             | 0.5                 | 8.0 $\pm$ 1.2                            | 6.3 $\pm$ 0.8  | 0.0 $\pm$ 0.0                              | 0.0 $\pm$ 0.0 |
| C18                 | 5.1 $\pm$ 0.8                                        | 3.2 $\pm$ 0.3  | 5.5 $\pm$ 1.9                             | 0.6                 | 5.1 $\pm$ 0.8                            | 3.2 $\pm$ 0.3  | 0.0 $\pm$ 0.0                              | 0.0 $\pm$ 0.0 |
| C20                 | 1.2 $\pm$ 0.5                                        | 0.2 $\pm$ 0.1  | 8.3 $\pm$ 0.7                             | 0.8                 | 1.2 $\pm$ 0.5                            | 0.2 $\pm$ 0.1  | 0.0 $\pm$ 0.0                              | 0.0 $\pm$ 0.0 |
| C22                 | 1.2 $\pm$ 0.2                                        | 16.4 $\pm$ 4.1 | 80.6 $\pm$ 5.3                            | 8.2                 | 1.2 $\pm$ 0.2                            | 15.4 $\pm$ 3.7 | 0.0 $\pm$ 0.0                              | 1.0 $\pm$ 0.4 |
| C24                 | 4.7 $\pm$ 2.7                                        | 1.1 $\pm$ 0.2  | 138.1 $\pm$ 17.5                          | 14.0                | 4.6 $\pm$ 2.7                            | 1.0 $\pm$ 0.2  | 0.1 $\pm$ 0.0                              | 0.1 $\pm$ 0.0 |
| C26                 | 0.9 $\pm$ 0.4                                        | 2.9 $\pm$ 0.8  | 16.6 $\pm$ 0.9                            | 1.7                 | 0.9 $\pm$ 0.4                            | 2.9 $\pm$ 0.8  | 0.0 $\pm$ 0.0                              | 0.0 $\pm$ 0.0 |
| Primary alcohols    |                                                      |                |                                           |                     |                                          |                |                                            |               |
| C16                 | ND                                                   | ND             | 1.7 $\pm$ 0.4                             | 0.2                 | ND                                       | ND             | ND                                         | ND            |
| C18                 | ND                                                   | ND             | 1.4 $\pm$ 0.6                             | 0.1                 | ND                                       | ND             | ND                                         | ND            |
| C20                 | ND                                                   | ND             | 1.9 $\pm$ 0.2                             | 0.2                 | ND                                       | ND             | ND                                         | ND            |
| C22                 | ND                                                   | ND             | 34.8 $\pm$ 2.9                            | 3.5                 | ND                                       | ND             | ND                                         | ND            |
| C24                 | ND                                                   | ND             | 39.4 $\pm$ 19.3                           | 4.0                 | ND                                       | ND             | ND                                         | ND            |
| C26                 | 5.5 $\pm$ 0.3                                        | 1.2 $\pm$ 0.4  | 62.5 $\pm$ 7.3                            | 6.3                 | 5.5 $\pm$ 0.4                            | 1.1 $\pm$ 0.4  | 0.0 $\pm$ 0.0                              | 0.0 $\pm$ 0.0 |
| C28                 | 0.4 $\pm$ 0.1                                        | 0.2 $\pm$ 0.0  | 15.5 $\pm$ 2.2                            | 1.6                 | 0.4 $\pm$ 0.1                            | 0.2 $\pm$ 0.0  | 0.0 $\pm$ 0.0                              | 0.0 $\pm$ 0.0 |

Table S2. Continued

|                    | Fruit cutin and Suberin<br>( $\mu\text{g cm}^{-2}$ ) |                  | Bark suberin<br>( $\mu\text{g cm}^{-2}$ ) | Bark Suberin<br>(%) | Fruit Cutin<br>( $\mu\text{g cm}^{-2}$ ) |                  | Fruit Suberin<br>( $\mu\text{g cm}^{-2}$ ) |                |
|--------------------|------------------------------------------------------|------------------|-------------------------------------------|---------------------|------------------------------------------|------------------|--------------------------------------------|----------------|
|                    | Dry/Dry                                              | Wet/Dry          |                                           |                     | Dry/Dry                                  | Wet/Dry          | Dry/Dry                                    | Wet/Dry        |
| Dicarboxylic acids |                                                      |                  |                                           |                     |                                          |                  |                                            |                |
| C16                | 2.9 $\pm$ 0.3                                        | 8.7 $\pm$ 1.5    | 26.5 $\pm$ 3.1                            | 2.7                 | 2.9 $\pm$ 0.3                            | 8.5 $\pm$ 1.5    | 0.0 $\pm$ 0.0                              | 0.2 $\pm$ 0.1  |
| C16:9,10-dihydroxy | 7.3 $\pm$ 2.1                                        | 8.2 $\pm$ 0.5    | ND                                        | ND                  | 7.3 $\pm$ 2.1                            | 8.2 $\pm$ 0.5    | 0.0 $\pm$ 0.0                              | 0.0 $\pm$ 0.0  |
| C18                | ND                                                   | ND               | 27.9 $\pm$ 3.1                            | 2.8                 | ND                                       | ND               | ND                                         | ND             |
| C18:1-hydroxy      | ND                                                   | ND               | 53.6 $\pm$ 7.8                            | 5.4                 | ND                                       | ND               | ND                                         | ND             |
| C18:9,10-dihydroxy | 7.6 $\pm$ 0.5                                        | 7.2 $\pm$ 1.7    | ND                                        | ND                  | 7.6 $\pm$ 0.5                            | 7.2 $\pm$ 1.7    | 0.0 $\pm$ 0.0                              | 0.0 $\pm$ 0.0  |
| C20                | ND                                                   | ND               | 16.8 $\pm$ 8.7                            | 1.7                 | ND                                       | ND               | ND                                         | ND             |
| C22                | ND                                                   | ND               | 7.6 $\pm$ 0.9                             | 0.8                 | ND                                       | ND               | ND                                         | ND             |
| Hydroxy acids      |                                                      |                  |                                           |                     |                                          |                  |                                            |                |
| C16: $\omega$      | 28.2 $\pm$ 2.3                                       | 9.3 $\pm$ 2.3    | 16.3 $\pm$ 2.2                            | 1.7                 | 28.2 $\pm$ 2.3                           | 9.2 $\pm$ 2.3    | 0.0 $\pm$ 0.0                              | 0.1 $\pm$ 0.0  |
| C18: $\omega$      | ND                                                   | ND               | 22.3 $\pm$ 2.6                            | 2.3                 | ND                                       | ND               | ND                                         | ND             |
| C18:1              | 17.9 $\pm$ 3.3                                       | 27.6 $\pm$ 7.6   | 136.0 $\pm$ 13.8                          | 13.8                | 17.8 $\pm$ 3.3                           | 25.0 $\pm$ 6.8   | 0.1 $\pm$ 0.0                              | 2.7 $\pm$ 1.0  |
| C18:2              | 0.8 $\pm$ 0.3                                        | 0.4 $\pm$ 0.0    | ND                                        | ND                  | 0.8 $\pm$ 0.3                            | 0.4 $\pm$ 0.0    | 0.0 $\pm$ 0.0                              | 0.0 $\pm$ 0.0  |
| C20: $\omega$      | 3.3 $\pm$ 0.7                                        | 5.9 $\pm$ 2.0    | 39.9 $\pm$ 4.2                            | 4.0                 | 0.0 $\pm$ 0.0                            | 0.0 $\pm$ 0.0    | 3.3 $\pm$ 0.7                              | 5.9 $\pm$ 2.0  |
| C22: $\omega$      | 1.0 $\pm$ 0.4                                        | 18.7 $\pm$ 4.7   | 88.2 $\pm$ 8.3                            | 9.0                 | 0.0 $\pm$ 0.0                            | 0.0 $\pm$ 0.0    | 1.0 $\pm$ 0.4                              | 18.7 $\pm$ 4.7 |
| C24: $\omega$      | 0.3 $\pm$ 0.1                                        | 5.8 $\pm$ 1.3    | 45.1 $\pm$ 3.0                            | 4.6                 | 0.0 $\pm$ 0.0                            | 0.0 $\pm$ 0.0    | 0.3 $\pm$ 0.1                              | 5.8 $\pm$ 1.3  |
| C16:10,16-di       | 192.1 $\pm$ 20.2                                     | 46.2 $\pm$ 18.9  | ND                                        | ND                  | 192.1 $\pm$ 20.2                         | 46.2 $\pm$ 18.9  | 0.0 $\pm$ 0.0                              | 0.0 $\pm$ 0.0  |
| C18:9,10,18-tri    | 58.1 $\pm$ 14.3                                      | 53.8 $\pm$ 14.7  | ND                                        | ND                  | 58.1 $\pm$ 14.3                          | 53.8 $\pm$ 14.7  | 0.0 $\pm$ 0.0                              | 0.0 $\pm$ 0.0  |
| HA1                | 85.8 $\pm$ 24.0                                      | 32.8 $\pm$ 8.3   | ND                                        | ND                  | 85.8 $\pm$ 24.0                          | 32.8 $\pm$ 8.3   | 0.0 $\pm$ 0.0                              | 0.0 $\pm$ 0.0  |
| Unidentified       |                                                      |                  |                                           |                     |                                          |                  |                                            |                |
| X1                 | ND                                                   | ND               | 4.2 $\pm$ 2.7                             | 0.4                 | ND                                       | ND               | ND                                         | ND             |
| X2                 | ND                                                   | ND               | 9.6 $\pm$ 7.4                             | 1.0                 | ND                                       | ND               | ND                                         | ND             |
| X3                 | ND                                                   | ND               | 10.6 $\pm$ 2.0                            | 1.1                 | ND                                       | ND               | ND                                         | ND             |
| X4                 | ND                                                   | ND               | 2.2 $\pm$ 0.6                             | 0.2                 | ND                                       | ND               | ND                                         | ND             |
| X5                 | ND                                                   | ND               | 3.8 $\pm$ 1.0                             | 0.4                 | ND                                       | ND               | ND                                         | ND             |
| X6                 | ND                                                   | ND               | 0.9 $\pm$ 0.3                             | 0.1                 | ND                                       | ND               | ND                                         | ND             |
| Total:             | 451.4 $\pm$ 65.2                                     | 265.7 $\pm$ 33.1 | 984.8 $\pm$ 86.8                          | 100                 | 446.6 $\pm$ 65.3                         | 231.3 $\pm$ 32.2 | 4.8 $\pm$ 0.6                              | 34.4 $\pm$ 9.0 |
